# Supplementary material
Source: PubMed Central journal article supplement (PMC2259061)
Supplement: plntphys_pp.107.110908_2.pdf [file plntphys_pp.107.110908_2.pdf]

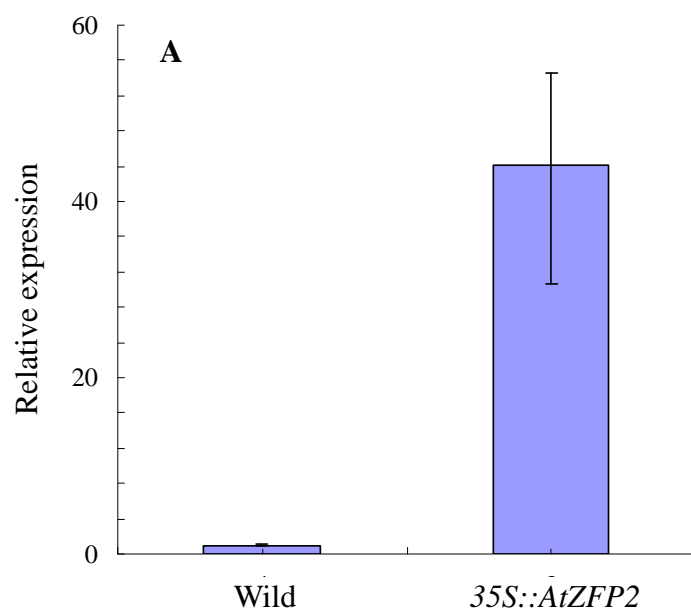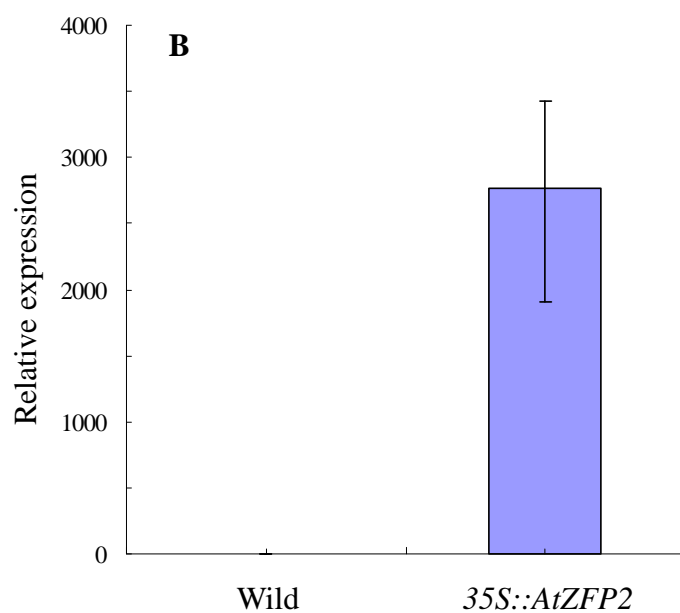

**Figure S2.** Quantitative RT-PCR measurement of transcripts representing combined *35S::AtZFP2* / endogenous *AtZFP2* and *35S::AtZFP2* only in wild type and *35S::AtZFP2* flowers. (A) Relative expression of combined *35S::AtZFP2* / endogenous *AtZFP2* with wild type normalized to 1. (B) Relative expression of *35S::AtZFP2* only, with background level normalized to 1. Information on methodology and replications are in Materials and Methods.
