# Supplementary material
Source: PubMed Central journal article supplement (PMC2259061)
Supplement: plntphys_pp.107.110908_6.pdf [file plntphys_pp.107.110908_6.pdf]

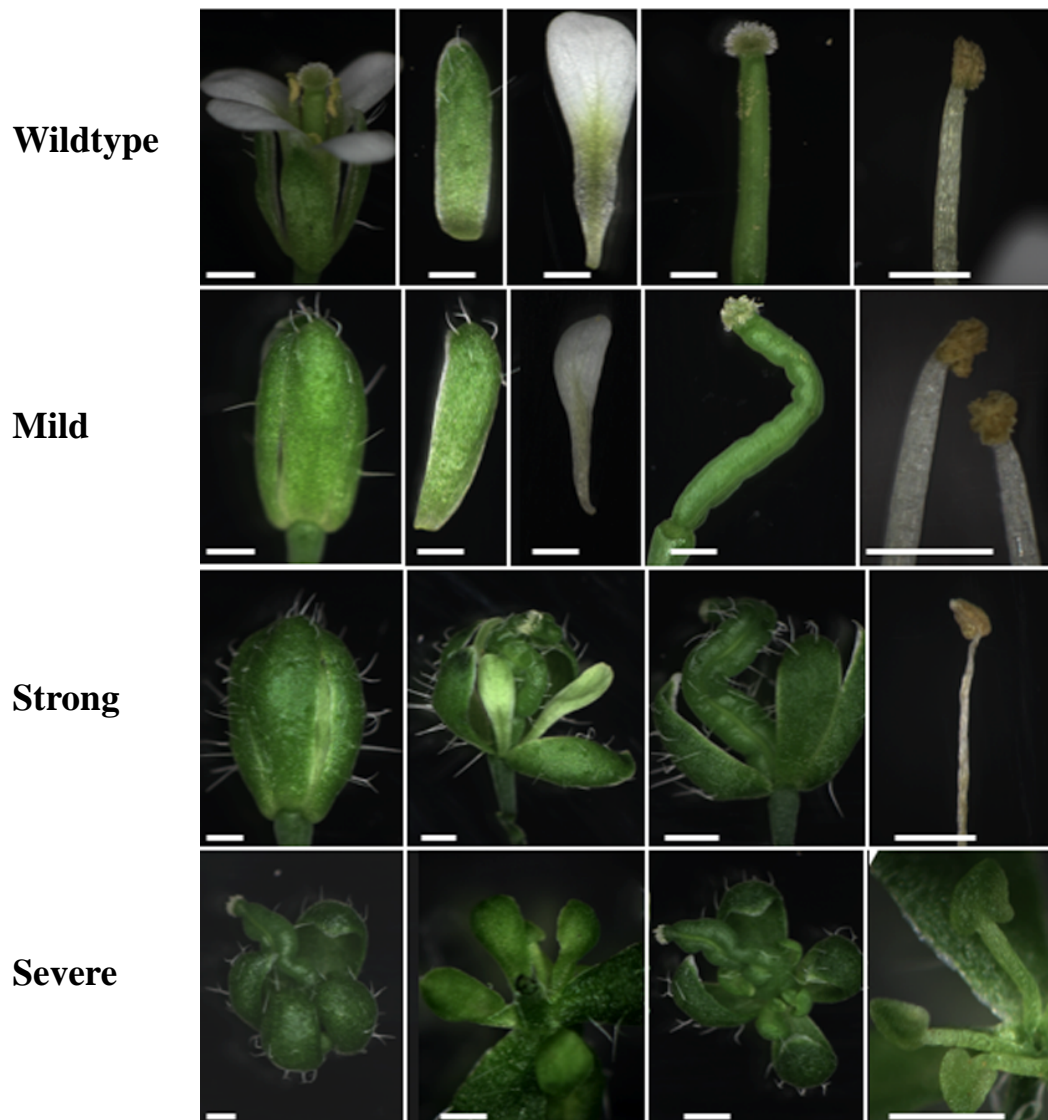

**Figure S3. Phenotypes of wildtype and 35S::*AtZFP2* floral organs.** Panels 1 and 2; Left to right: flower, sepal, petal, carpel, stamen. Panels 3 and 4; Left to right: flower, green petals on flower, distorted carpels on flower, stamen. Scale bars equal to 500  $\mu$ m.
